# Supplementary material for: The Angiogenesis Inhibitor Isthmin-1 (ISM1) Is Overexpressed in Experimental Models of Glomerulopathy and Impairs the Viability of Podocytes
Source: MDPI journal article supplement (doi:10.3390/ijms24032723), 2023-02-01
Supplement: s1 [file s1]

## SUPPLEMENTARY DATA

**TABLE S1**

| Gene name                   | Direction Primer sequence (5'-3')                                          |
|-----------------------------|----------------------------------------------------------------------------|
| <b>β5 (rat and mouse)</b>   | <i>fwd</i> : ACCTGCCAAGATGGCATATC<br><i>rev</i> : CACGGACACTTCAAAGGATG     |
| <b>GRP78 (rat)</b>          | <i>fwd</i> : CCGTAACAATCAAGGTCTACGA<br><i>rev</i> : AAGGTGACTTCAATCTGGGGTA |
| <b>GRP78 (mouse)</b>        | <i>fwd</i> : CTGAGGCGTATTTGGGAAAG<br><i>rev</i> : TCATGACATTCAGTCCAGCAA    |
| <b>ISM1 (rat and mouse)</b> | <i>fwd</i> : TCCAGATCTTTCCAAAGCTGAT<br><i>rev</i> : GCCATCAACCACCTCTATGG   |
| <b>IL6 (mouse)</b>          | <i>fwd</i> : CCAGGTAGCTATGGTACTCCAGAA<br><i>rev</i> : TGCCTTCATTATCCCTTGAA |
| <b>HPRT (mouse)</b>         | <i>fwd</i> : GGAGCGGTAGCACCTCCT<br><i>rev</i> : CTGGTTCATCATCGCTAATCAC     |
| <b>HPRT (rat)</b>           | <i>fwd</i> : GACCGGTTCTGTCATGTCG<br><i>rev</i> : ACCTGGTTCATCATCACTAATCAC  |
| <b>Gusb (Mouse)</b>         | <i>fwd</i> : CTCTGGTGGCCTTACCTGAT<br><i>rev</i> : CAGTTGTTGTCACCTTCACCTC   |

**Table S1. Gene-specific primer sequences used for RT-qPCR**

**TABLE S2**

| Up-regulated genes |             |          |  | Down-regulated genes |             |          |
|--------------------|-------------|----------|--|----------------------|-------------|----------|
| Symbol             | Fold Change | p-value  |  | Symbol               | Fold Change | p-value  |
| HAVCR1             | 36,082      | 7.42E-08 |  | Slc7a12              | -9,996      | 1.35E-03 |
| SERPINA3           | 23,150      | 1.28E-03 |  | RGD1563294           | -6,425      | 3.16E-05 |
| FGB                | 18,605      | 1.92E-07 |  | Akr1c12              | -5,578      | 1.76E-03 |
| GPNMB              | 8,954       | 7.32E-06 |  | RGN                  | -5,501      | 7.61E-04 |
| HMOX1              | 8,562       | 2.21E-03 |  | Slco1a1              | -5,164      | 1.06E-02 |
| IGFBP1             | 7,673       | 1.06E-05 |  | CACNG5               | -5,028      | 5.68E-03 |
| ALOX15             | 7,133       | 1.35E-03 |  | HNMT                 | -5,010      | 5.81E-04 |
| PDK4               | 6,936       | 1.05E-06 |  | SLC7A13              | -4,980      | 1.50E-03 |
| ADAMTS1            | 6,929       | 1.53E-06 |  | PRIMA1               | -4,795      | 4.32E-03 |
| GPX2               | 6,715       | 1.43E-03 |  | HRG                  | -4,737      | 1.98E-03 |
| ANGPTL4            | 6,471       | 4.85E-07 |  | Olf136               | -4,648      | 1.83E-02 |
| S100A8             | 6,372       | 2.49E-02 |  | GC                   | -4,339      | 6.88E-03 |
| SPP1               | 6,313       | 1.48E-06 |  | Cml1                 | -4,216      | 7.29E-04 |
| HMGCS2             | 6,023       | 3.00E-03 |  | Ces1e                | -4,207      | 5.15E-04 |
| SERPINE1           | 5,975       | 6.62E-06 |  | Slco1a6              | -3,863      | 5.63E-03 |
| FGA                | 5,805       | 4.59E-05 |  | Olr1408              | -3,808      | 1.29E-02 |
| TIMP1              | 5,453       | 3.26E-06 |  | Kap                  | -3,754      | 3.25E-02 |
| CLU                | 5,208       | 7.98E-06 |  | CYP2C9               | -3,724      | 2.40E-02 |
| SLC34A2            | 5,155       | 1.61E-05 |  | GUCY1B2              | -3,631      | 7.38E-05 |
| FGG                | 5,067       | 1.06E-05 |  | CHTF18               | -3,572      | 4.34E-03 |
| LAMC2              | 4,874       | 4.02E-05 |  | SPATA22              | -3,511      | 1.25E-04 |
| FAM129A            | 4,755       | 1.03E-08 |  | SLCO4C1              | -3,498      | 2.77E-04 |
| CDKN1A             | 4,742       | 6.29E-05 |  | AFM                  | -3,472      | 1.59E-03 |
| RASD1              | 4,539       | 3.07E-05 |  | MLC1                 | -3,426      | 3.18E-03 |
| BTG2               | 4,533       | 2.45E-03 |  | SLC22A25             | -3,407      | 1.28E-03 |

**Table S2: Top 25 up- and down-regulated genes in L-NAME model between W0 and CTL groups.**

TABLE S3

|              | UAER        |             |        | UPER       |            |        | Albuminemia |           |        |
|--------------|-------------|-------------|--------|------------|------------|--------|-------------|-----------|--------|
|              | CTL         | model       | p      | CTL        | model      | p      | CTL         | model     | p      |
| <i>PAN</i>   | 0.00±0.000  | 2.42±0.15   | <0.001 | 0.06±0.004 | 12.71±0.75 | <0.001 | 14.9±0.65   | 4.38±0.35 | <0.001 |
| <i>DOXO</i>  | 0.00±0.000  | 3.02±0.12   | <0.001 | 0.15±0.01  | 9.18±0.51  | <0.001 | 16.47±0.57  | 4.25±0.16 | <0.001 |
| <i>ob/ob</i> | 0.002±0.001 | 0,056±0.008 | <0.001 |            |            |        |             |           |        |
| <i>LPS</i>   | 0.04±0.01   | 0.27±0.04   | <0.001 |            |            |        |             |           |        |

**Table S3. Biochemical parameters in animal models of glomerulopathy.** UAER (g/mmol), UPER (g/mmol) and albuminemia (g/L) in PAN and DOX models. UAER (g/mmol) in ob/ob model and UAER (g/g) in LPS model. . UAER: Urinary albumin excretion ratio and UPER: Urinary protein excretion ratio.

TABLE S4

(DOWNLOAD EXCEL FILE)

**Table S4: Genes related to ISM1 regulation during renal regeneration.** This table describes the statistics identified by the supervised Pavlidis template matching algorithm on ISM1 expression during renal regeneration. For each column of significant genes: correlation coefficient rvalues, raw p-values and False Discovery Rate adjust qvalues.

**FIGURE S1**

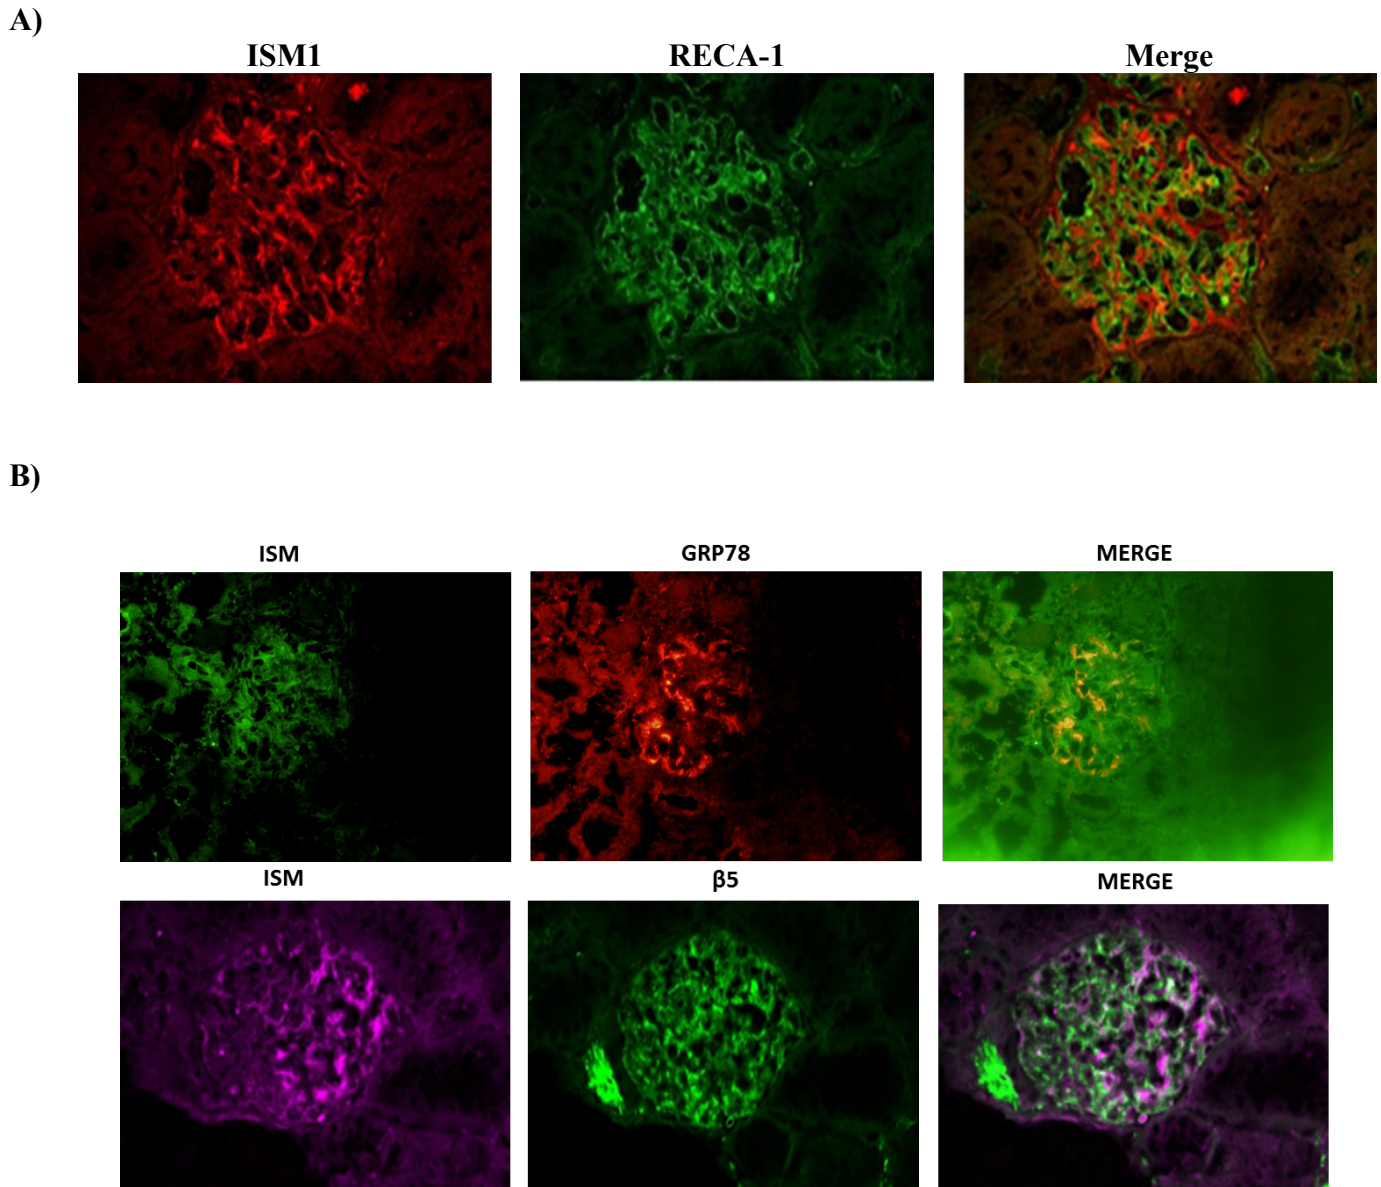

**Figure S1. Immunohistochemical analysis of co-localization of ISM1:** A) ISM1 does not colocalize with RECA-1, a rodent pan-endothelial cell marker. B) Co-localization of ISM1 with its receptors, GRP78 and beta5 integrin in rats.
